# Supplementary material for: Modeling and tuning the electronic, mechanical and optical properties of a recently synthesized 2D polyaramid: a first principles study
Source: Royal Society of Chemistry journal article supplement (doi:10.1039/d4cp02027h), 2024-01-01
Supplement: d4cp02027h1.pdf [file d4cp02027h1.pdf]

# Modeling and Tuning the Electronic, Mechanical and Optical Properties of Recently Synthesized 2D Polyaramids: A First Principles Study

Mukesh Singh<sup>a</sup>, Surinder Pal Kaur<sup>b</sup>, Brahmananda Chakraborty<sup>c,d\*</sup>,

<sup>a</sup>Department of Physics, Indian Institute of Technology Bombay, Powai, Mumbai 400076, India.

<sup>b</sup>Quantum Dynamics Lab, Department of Chemistry, Indian Institute of Technology Ropar, Rupnagar, 140001, India

<sup>c</sup>High Pressure and Synchrotron Radiation Physics Division, Bhabha Atomic Research Centre, Trombay, Mumbai, India

<sup>d</sup>Homi Bhabha National Institute, Mumbai, India

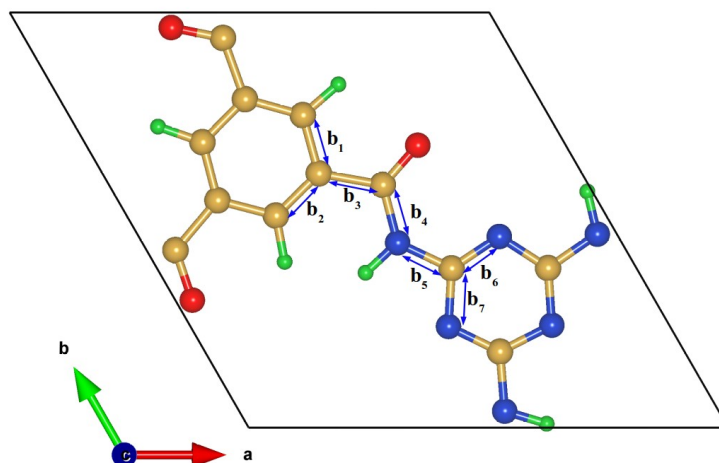

**Fig. S1:** Names of bonds in geometrically optimized 2DPA-1 structure are shown with double arrows. In the case of NN-2DPA and BN-2DPA structures, we replace the name of bonds with superscript NN and BN, respectively. For example,  $b_1^{NN}$ ,  $b_1^{BN}$  represent names of bonds in place of b1 in NN and BN-2DPA structures.

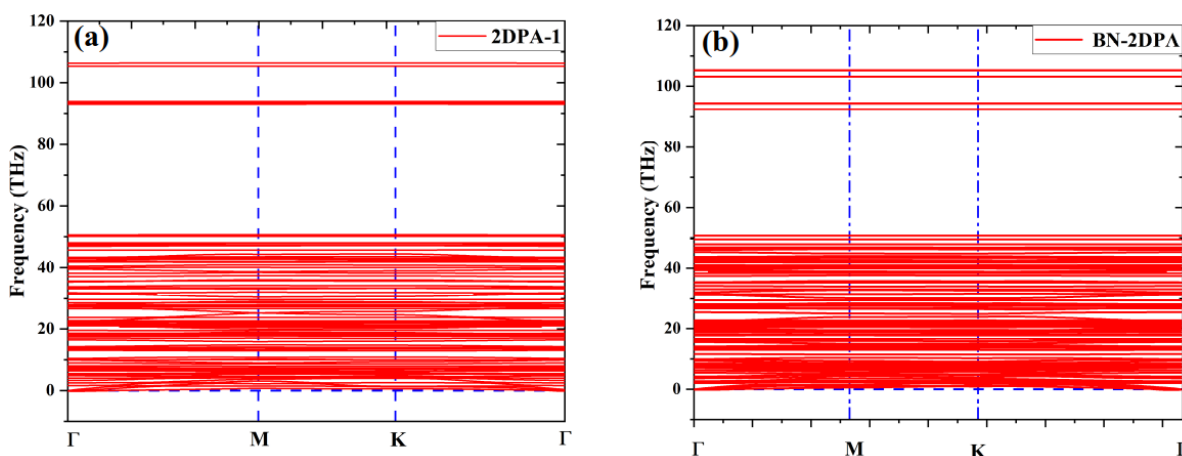

**Fig. S2:** Full Phonon spectra of (a) 2DPA-1, (b) BN-2DPA systems.

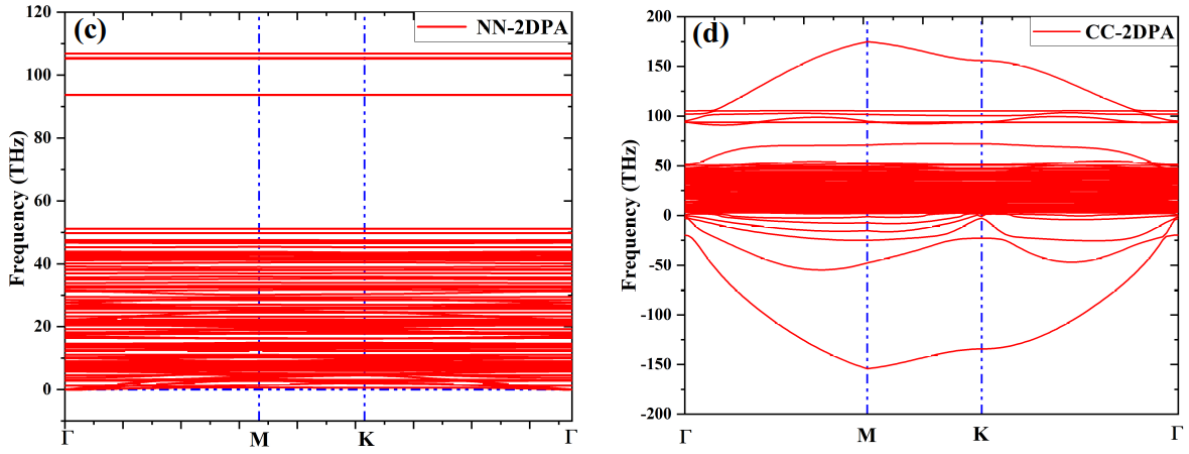

**Fig. S3:** Full Phonon spectra of (a) NN-2DPA, (b) CC-2DPA systems.

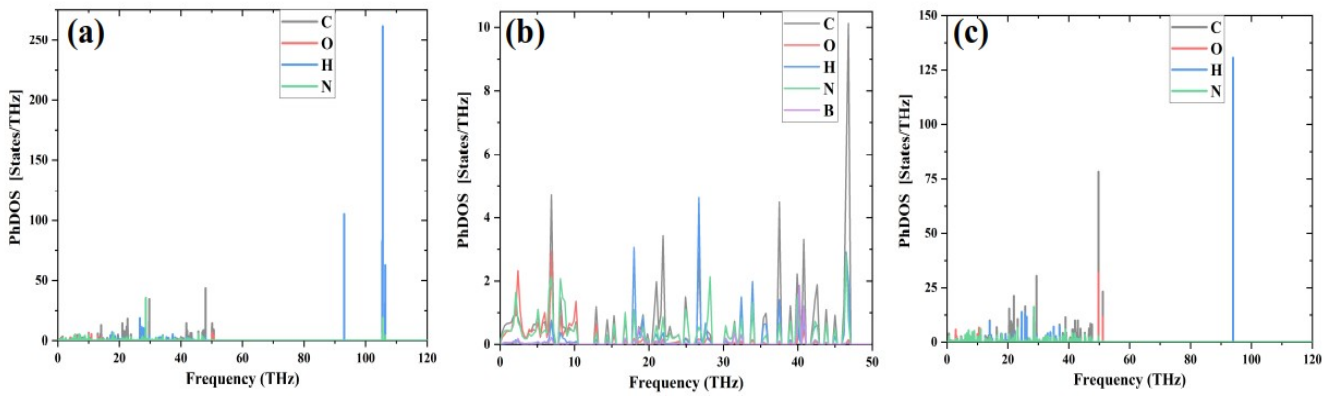

**Fig. S4:** Full Ph-DOS in the range of (0-20) THz of (a) 2DPA-1, (b) BN-2DPA, and (c) NN-2DPA systems.

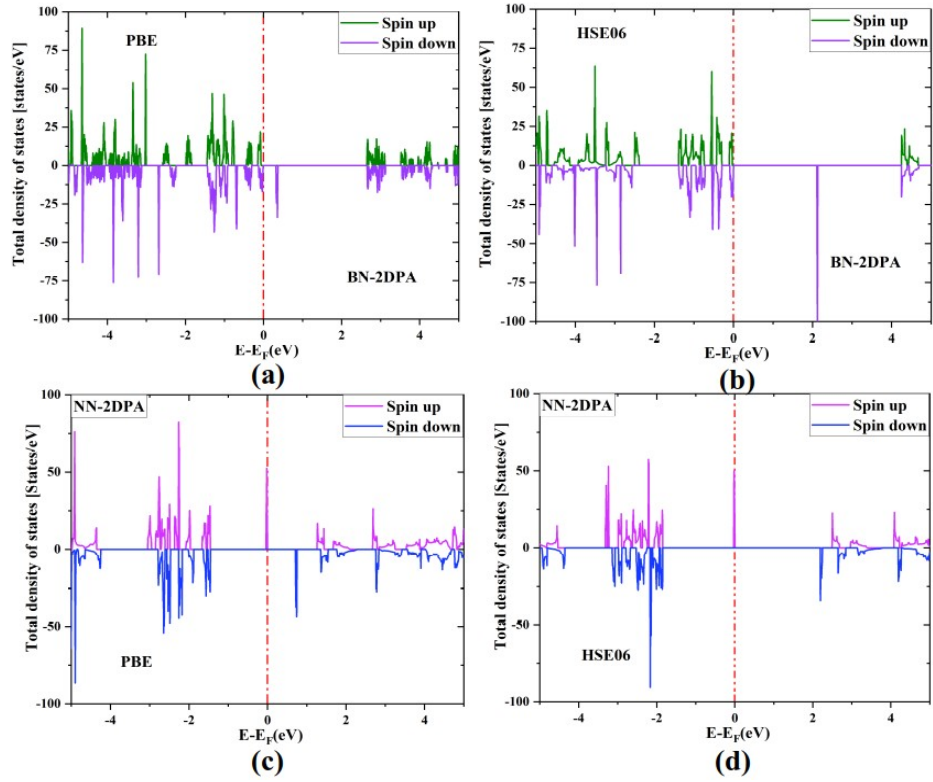

**Fig. S5:** Spin-polarized total density of states of (a) BN-2DPA using PBE, (b) BN-2DPA using HSE06, (c) NN-2DPA using PBE, (d) NN-2DPA using HSE06

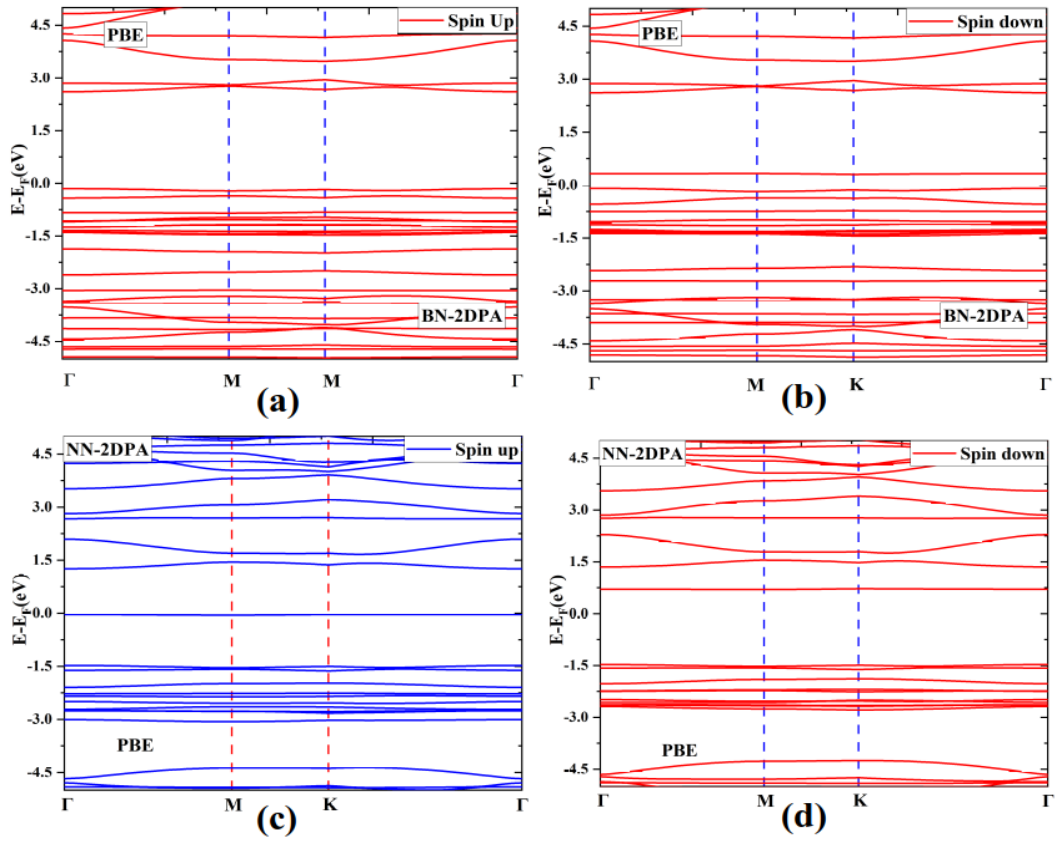

**Fig. S6:** Using PBE functional, spin-polarized band structure of (a) BN-2DPA for spin up channel, (b) BN-2DPA for spin down channel, (c) NN-2DPA for spin up channel, (d) NN-2DPA for spin down channel

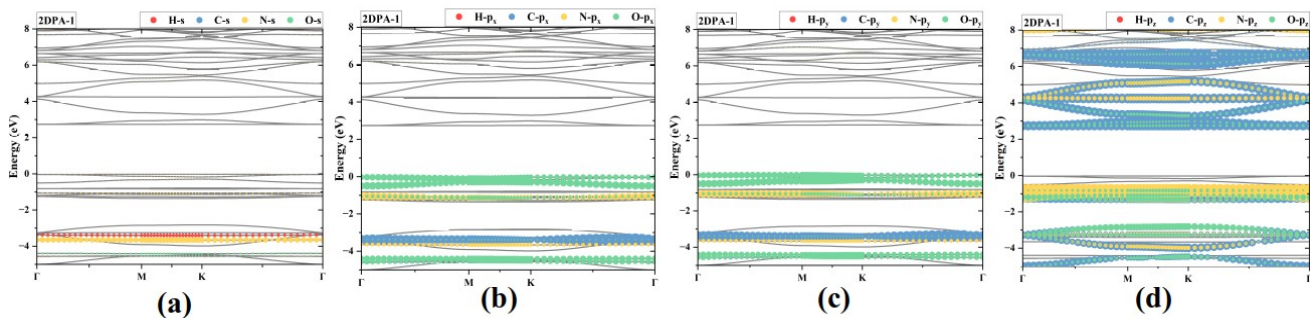

**Fig. S7:** Using PBE functional projected band structures of each different atom of 2DPA-1 with orbital (a) s, (b) px, (c) py, (d) pz.

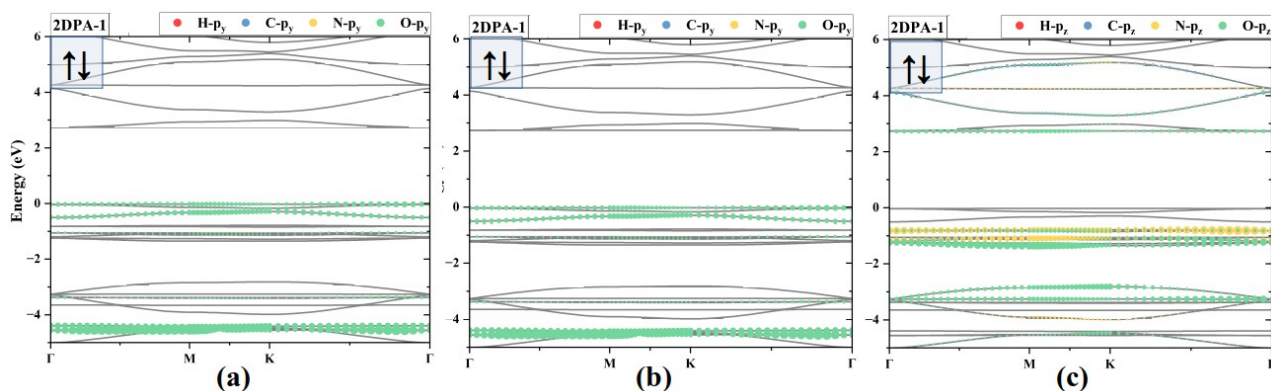

**Fig. S8:** Using PBE functional p-orbital projected band structures of 2DPA-1 for amide group and its nearest H and O atoms. The up/down arrows indicate spin-up/down.

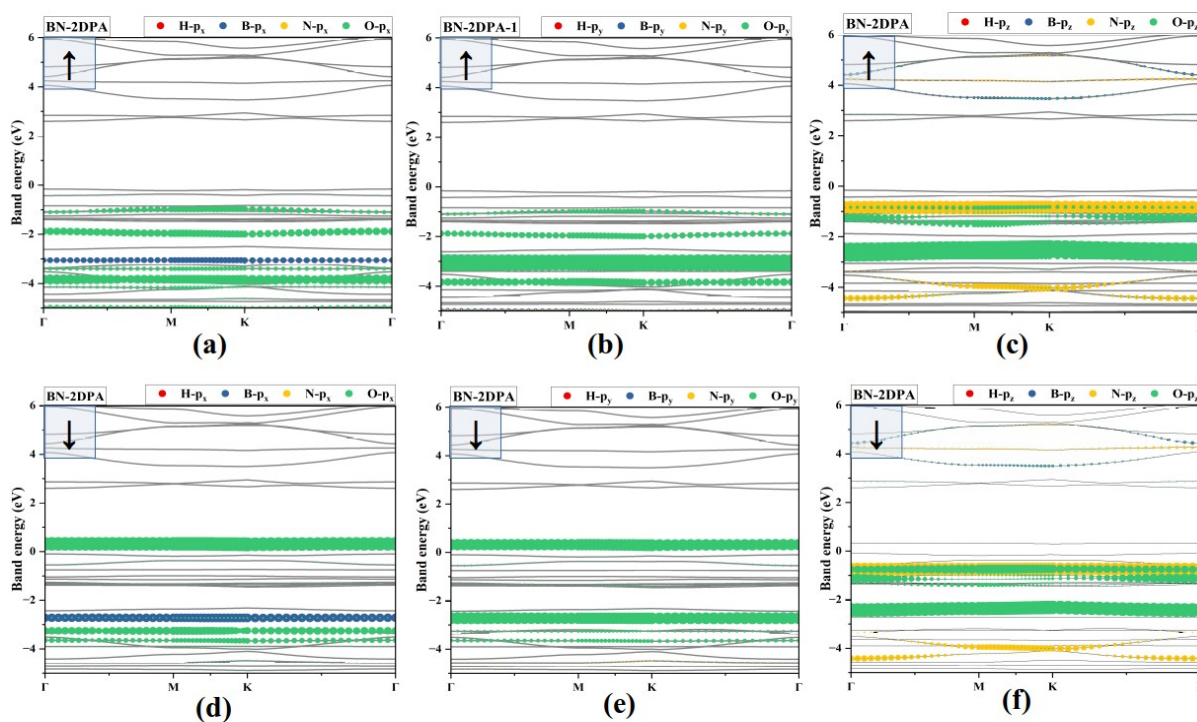

**Fig. S9:** Using PBE functional p-orbital projected band structures of BN-2DPA for BN group and its nearest H and O atoms with spin-up (a-c) and spin-down (d-f). The up/down arrows indicate spin-up/down.

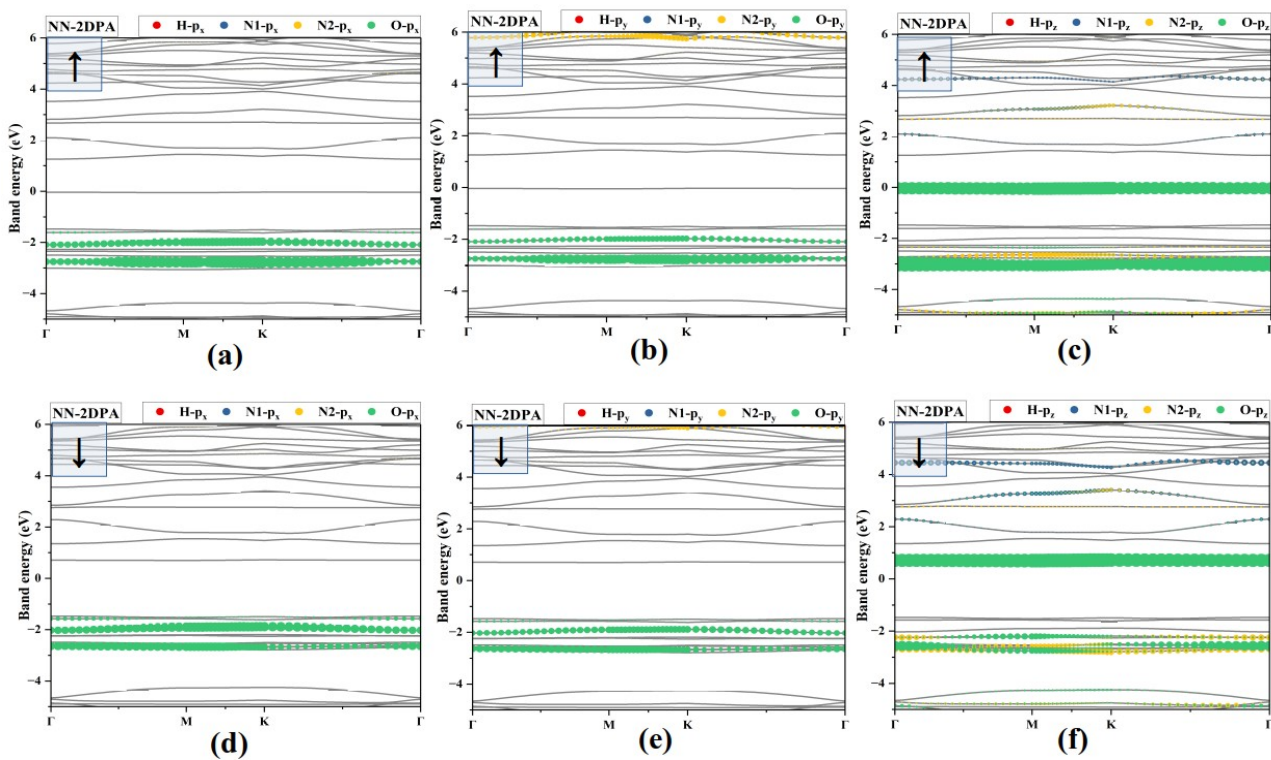

**Fig. S10:** Using PBE functional p-orbital projected band structures of NN-2DPA for NN group and its nearest H and O atoms with spin-up (a-c) and spin-down (d-f). The up/down arrows indicate spin-up/down.

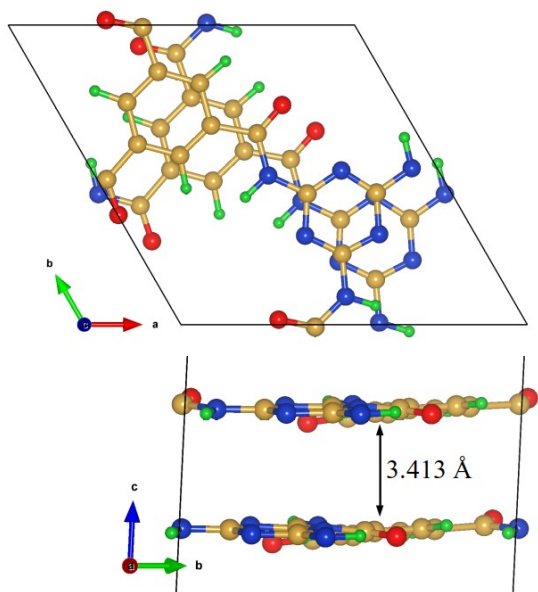

**Fig. S11:** Top and side views of double layered 2DPA-1 optimized structure with PBE+Grimee-D3.

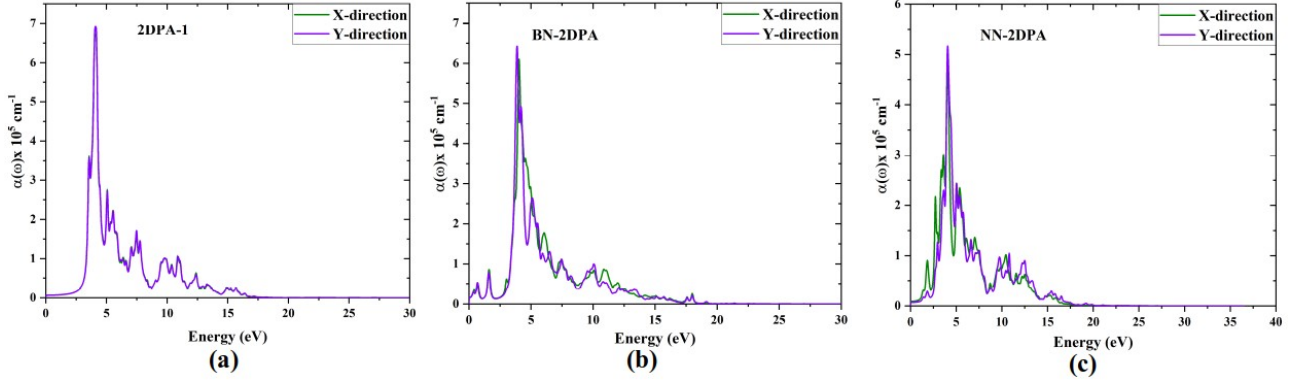

**Fig. S12:** Optical absorption spectra of (a) 2DPA-1, (b) BN-2DPA, and (c) NN-2DPA using the PBE functional.

**Table S1:** Geometrical optimized parameters of 2DPA-1, BN, and NN-2DPA systems. The names of the bonds are indicated in Fig. S1.

| S.N. | System  | Bond-length<br>(Å)                                                                                             | Band gap (eV) |       |
|------|---------|----------------------------------------------------------------------------------------------------------------|---------------|-------|
|      |         |                                                                                                                | PBE           | HSE06 |
| 1.   | 2DPA-1  | $b_1=1.40, b_2=1.40, b_3=1.51,$<br>$b_4=1.39, b_5=1.39, b_6=1.33, b_7=1.35$                                    | 2.76          | 4.42  |
| 2.   | BN-2DPA | $b_1^{BN}=1.40, b_2^{BN}=1.40, b_3^{BN}=1.59,$<br>$b_4^{BN}=1.44, b_5^{BN}=1.35, b_6^{BN}=1.34, b_7^{BN}=1.34$ | 0.32          | 2.13  |
| 3.   | NN-2DPA | $b_1^{NN}=1.41, b_2^{NN}=1.40, b_3^{NN}=1.42,$<br>$b_4^{NN}=1.39, b_5^{NN}=1.38, b_6^{NN}=1.33, b_7^{NN}=1.36$ | 0.74          | 2.19  |

**Table S2:** Cohesive energy comparison with different 2D materials composed of carbon, boron, and nitrogen:

| S.N | System                            | Cohesive energy (eV/atom) |
|-----|-----------------------------------|---------------------------|
| 1.  | Pristine hBN                      | $-6.91^1, -7.59^{2,3}$    |
| 2.  | graphene                          | $-7.90^4$                 |
| 3.  | $\alpha, \beta, \gamma$ -graphyne | $6.93, 7.01, 7.21^5$      |
| 4.  | Borophene                         | $-5.99^6$                 |
| 5.  | Porous borophene-graphene(pBGH)   | $-5.59^7$                 |
| 6.  | BC <sub>2</sub> N                 | $-6.40^8$                 |
| 7.  | C <sub>6</sub> N <sub>7</sub>     | $-6.26^{9,10}$            |
| 8.  | g-C <sub>2</sub> N                | $-6.83^{11}$              |
| 9.  | T-C <sub>3</sub> N <sub>2</sub>   | $-6.62^{12}$              |
| 10. | C <sub>3</sub> N <sub>4</sub>     | $-6.09^{13}$              |

|            |                               |                     |
|------------|-------------------------------|---------------------|
| 11.        | Be <sub>2</sub> C             | -5.33 <sup>14</sup> |
| 12.        | BC <sub>2</sub> As            | -5.77 <sup>8</sup>  |
| <b>13.</b> | <b>2DPA-1 (present work)</b>  | <b>-5.76</b>        |
| <b>14.</b> | <b>BN-2DPA (present work)</b> | <b>-5.72</b>        |
| <b>15.</b> | <b>NN-2DPA (present work)</b> | <b>-5.55</b>        |
| <b>16.</b> | <b>CC-2DPA (present work)</b> | <b>-5.76</b>        |

**Table S3:** Comparison of workfunctions of our system with other 2D systems.

| S.N. | System                          | Workfunction (used functional) (eV)                         |
|------|---------------------------------|-------------------------------------------------------------|
| 1.   | <b>2DPA-1 (present work)</b>    | 6.18 (PBE), 7.46 (HSE06)                                    |
| 2.   | <b>BN-2DPA (present work)</b>   | 6.07 (PBE), 7.19 (HSE06)                                    |
| 3.   | <b>NN-2DPA (present work)</b>   | 4.72 (PBE), 5.61 (HSE06)                                    |
| 4.   | Graphene                        | 4.23 <sup>15</sup> , 4.49 <sup>16</sup> , 4.6 <sup>17</sup> |
| 5.   | Reduced graphene oxide (rGO)    | 5 to 5.5eV <sup>18</sup>                                    |
| 6.   | Graphyne                        | 4.06 <sup>19</sup> , 4.04 <sup>20</sup>                     |
| 7.   | Holey graphyne                  | 5.2 <sup>21</sup>                                           |
| 8.   | g-C <sub>3</sub> N <sub>4</sub> | 4.29 <sup>22</sup>                                          |
| 9.   | g-C <sub>6</sub> N <sub>7</sub> | 6.2 <sup>10</sup>                                           |
| 10.  | h-BN                            | 5.99 <sup>23</sup>                                          |

**Table S4:** Comparison of Young-modulus of our system with other 2D systems.

| S.N. | System                                                                        | Young-modulus                      |
|------|-------------------------------------------------------------------------------|------------------------------------|
| 1.   | <b>2DPA-1 (present work)</b>                                                  | 40.166 N/m ~ 11.76 GPa             |
| 2.   | <b>BN-2DPA (present work)</b>                                                 | 17.132 N/m                         |
| 3.   | <b>NN-2DPA (present work)</b>                                                 | 27.577 N/m                         |
| 4.   | 2DPA-1 (experimental report)                                                  | 12.7±3.8 GPa <sup>24</sup>         |
| 5.   | Polyamide/ melamine cyanurate/nanoclay composites                             | 2.7-6.8 GPa <sup>25</sup>          |
| 6.   | polymethylmethacrylate (acrylic), polyamide (nylon), low density polyethylene | 1.99, 1.06, 0.29 GPa <sup>26</sup> |
| 7.   | Cu <sub>4</sub> Se <sub>4</sub>                                               | 55.73 N/m <sup>27</sup>            |
| 8.   | hydrogenated Pt <sub>2</sub> N <sub>4</sub>                                   | 221 N/m <sup>28</sup>              |

|     |                                 |                                                 |
|-----|---------------------------------|-------------------------------------------------|
| 9.  | V <sub>2</sub> S <sub>2</sub> O | 144.5 N/m <sup>29</sup>                         |
| 10. | g-C <sub>3</sub> N <sub>4</sub> | 187 N/m <sup>30</sup>                           |
| 11. | Biphenylene                     | 259.7 N/m <sup>31</sup>                         |
| 12. | BN-biphenylene                  | 235 N/m <sup>32</sup>                           |
| 13. | Graphene                        | 1000 GPa <sup>33</sup> or 342 N/m <sup>34</sup> |

\*\*\*\*\* **Data Availability** \*\*\*\*\*

Optimized 2DPA-1

```

1.0000000000000000
  11.1377945125528992  0.0578502646368065  -0.0066633272261499
 -5.6260539446337310  9.6152202988477082   0.0215246862422770
 -0.4251855798769966  0.3691953680033111  15.0000000000000000
C      O      H      N
  12      3      6      6

```

Direct

```

0.3864479126993719  0.7914120500430936  0.4978841778106429
0.20770571110596161  0.5475623645854794  0.5042426052506044
0.3112625077855278  0.5108402101949886  0.5037348430846671
0.4512239505174185  0.6124913408520074  0.4995267448144746
0.4139816491533609  0.9387922927984074  0.4955227040098126
0.4879255811859018  0.7528813809572463  0.4966950920790302
0.2461946431129697  0.6877218945936849  0.5012032277904572
0.5709474559769875  0.5849568078626511  0.4981463057007584
0.8158528562310319  0.3845690110335857  0.5036829898357912
0.6143067925479833  0.3838536326316404  0.4997642196628757
0.6150856139425157  0.1831916272863910  0.4998457739976245
0.0603892121235391  0.4277441861861457  0.5076625881134309
0.3186048349130592  0.9638125267265045  0.4913273595538700
0.6913186047289805  0.6804097807063092  0.4966565051915499
0.0354058948039816  0.3073417259420499  0.5116402301844323
0.2741079252474276  0.3995703150812153  0.5068711780376178
0.5990224151420332  0.8269104717115241  0.4931679414872820
0.1722630246149151  0.7249781292689752  0.5013132471950397
0.4297529465663831  0.3730307186412206  0.4976733968910017

```



|                    |                    |                    |
|--------------------|--------------------|--------------------|
| 0.9897449602666265 | 0.5689700050347697 | 0.5042328347063100 |
| 0.6258700245392814 | 0.0095164678795492 | 0.5022166100615335 |
| 0.5324386046475401 | 0.4452586517479298 | 0.4987105176582240 |
| 0.5536426084255619 | 0.0399528897484912 | 0.4990615437914934 |
| 0.5382541239564983 | 0.2439876658223998 | 0.4981279484760620 |
| 0.7550418134816875 | 0.2470168595262550 | 0.5027026959791273 |
| 0.7519526857767133 | 0.4606154610695299 | 0.5025032472347559 |
| 0.9591746517764986 | 0.4662718918167573 | 0.5055168673390278 |

Optimized BN-2DPA

1.0000000000000000

|                     |                     |                     |
|---------------------|---------------------|---------------------|
| 11.0374244000636832 | -0.1483885965565327 | 0.0000000000000000  |
| -5.6471794033002531 | 9.9137128761755022  | 0.0000000000000000  |
| -0.4366625882260887 | 0.3731940879747455  | 15.0000000000000000 |

| C  | O | H | N | B |
|----|---|---|---|---|
| 11 | 3 | 6 | 6 | 1 |

Direct

|                    |                    |                    |
|--------------------|--------------------|--------------------|
| 0.3930748740856967 | 0.7959910788357882 | 0.4981636265901653 |
| 0.2098311020643783 | 0.5578811774623823 | 0.5048067509003942 |
| 0.3142178992978522 | 0.5223083636791793 | 0.5050298239238442 |
| 0.4572045038216997 | 0.6199086318365246 | 0.5008892428475200 |
| 0.4201391818380764 | 0.9396147609626648 | 0.4950049994877606 |
| 0.4955487528528962 | 0.7579192211740210 | 0.4976804284717886 |
| 0.2502949774609290 | 0.6951798598200861 | 0.5013087094905784 |
| 0.8122792397397612 | 0.3880842336688496 | 0.5031843196247541 |
| 0.5965660342710994 | 0.3685241203315307 | 0.4975542509063148 |
| 0.6153230984445828 | 0.1818637271303220 | 0.4991986635340352 |
| 0.0610542259800785 | 0.4398839919010238 | 0.5080479433857000 |
| 0.3224386495024891 | 0.9617356630538992 | 0.4894907998155278 |
| 0.7074186153554044 | 0.6577303531220793 | 0.5034410225863835 |
| 0.0360248078875799 | 0.3222593608748242 | 0.5124062475907605 |
| 0.2757176682437169 | 0.4133702928610649 | 0.5086914029341810 |
| 0.6075174633482928 | 0.8333237584185050 | 0.4942196049562999 |
| 0.1763634686956747 | 0.7321643604336223 | 0.5008667498229254 |
| 0.4104596933761818 | 0.3554117912074473 | 0.4926731662457755 |

|                    |                    |                    |
|--------------------|--------------------|--------------------|
| 0.9850659125223972 | 0.5745194177809202 | 0.5033534810147026 |
| 0.6366724687461801 | 0.0167288529869423 | 0.5035977939809355 |
| 0.5146313776476898 | 0.4255662416255567 | 0.4958015893814506 |
| 0.5608640627756140 | 0.0423591230068498 | 0.4991793838477825 |
| 0.5292197163315955 | 0.2313861888430569 | 0.4961192222162320 |
| 0.7570898237214860 | 0.2538469335773366 | 0.5028723683338986 |
| 0.7364804619665538 | 0.4508762457059735 | 0.5008184798775361 |
| 0.9562803641802747 | 0.4745415964659284 | 0.5052848275281235 |
| 0.5697323348275377 | 0.5714153831669874 | 0.4999484227046052 |

Optimized NN-2DPA

1.0000000000000000

11.0576179929276144 0.0473648306938922 0.0000000000000000

-5.4886619841498927 9.6031722114775775 0.0000000000000000

-0.4311569923300094 0.3575943141406847 15.0000000000000000

C O H N

11 3 6 7

Direct

|                    |                    |                    |
|--------------------|--------------------|--------------------|
| 0.3874950759155026 | 0.7913734644424738 | 0.4984918460738704 |
| 0.2091087718083335 | 0.5477918640318734 | 0.5047364715011839 |
| 0.3118842717230657 | 0.5089092290374533 | 0.5046197570363226 |
| 0.4523794761566366 | 0.6112815021871264 | 0.5001612071039043 |
| 0.4152044726661042 | 0.9396221898519315 | 0.4960021641511485 |
| 0.4900986268615528 | 0.7531676991493432 | 0.4972519141013629 |
| 0.2466629707044826 | 0.6884800201311647 | 0.5016956423860769 |
| 0.8161995104865839 | 0.3854920312943595 | 0.5041433266183852 |
| 0.6139069861976538 | 0.3856024382692644 | 0.4997840020324328 |
| 0.6156428448315986 | 0.1840709978379887 | 0.4995623680807754 |
| 0.0617380038670020 | 0.4278765029743998 | 0.5078392900911763 |
| 0.3194576303658900 | 0.9656127854233025 | 0.4920428110269879 |
| 0.6882929836361656 | 0.6767569971808586 | 0.4934096420126757 |
| 0.0375503881194671 | 0.3071123893300638 | 0.5114786585556005 |
| 0.2736737552865269 | 0.3971865368750274 | 0.5082310160472417 |
| 0.6010254610898835 | 0.8266917577681805 | 0.4936130104002191 |

|                    |                    |                    |
|--------------------|--------------------|--------------------|
| 0.1724111204600948 | 0.7264755384085432 | 0.5016024030690425 |
| 0.4252842831995793 | 0.3728735755744589 | 0.4938925035571085 |
| 0.9901314965518564 | 0.5699359281326011 | 0.5044404830478509 |
| 0.6278491437925781 | 0.0098093262761850 | 0.5025143005970746 |
| 0.5628486116567477 | 0.5818519556660710 | 0.4975080292710646 |
| 0.5281869021826955 | 0.4431638854672078 | 0.4982224316582136 |
| 0.5549121389479945 | 0.0404392810111791 | 0.4990528465166330 |
| 0.5380746817256911 | 0.2451450958937604 | 0.4973242595407469 |
| 0.7561747039670941 | 0.2476299224029128 | 0.5026046796312534 |
| 0.7518607222251745 | 0.4623704197877175 | 0.5036148084915761 |
| 0.9598639625740129 | 0.4669371565945650 | 0.5057934494000617 |

## References:

- 1 S. B. Sharma, R. Bhatta, K. R. Sigdel, R. P. Adhikari and G. C. Kaphle, *Eur. Phys. J. B*, 2021, **94**, 128.
- 2 A. R. Juárez, E. C. Anotá, H. H. Cocolletzi, J. F. S. Ramírez and M. Castro, *Fullerenes, Nanotubes and Carbon Nanostructures*, 2017, **25**, 716–725.
- 3 D. Singh, V. Shukla, N. Khossossi, P. Hyldgaard and R. Ahuja, *Phys. Rev. Materials*, 2022, **6**, 116001.
- 4 H. Shin, S. Kang, J. Koo, H. Lee, J. Kim and Y. Kwon, *The Journal of Chemical Physics*, 2014, **140**, 114702.
- 5 A. R. Puigdollers, G. Alonso and P. Gamallo, *Carbon*, 2016, **96**, 879–887.
- 6 B. Peng, H. Zhang, H. Shao, Y. Xu, R. Zhang and H. Zhu, *Journal of Materials Chemistry C*, 2016, **4**, 3592–3598.
- 7 A. Kochaev, M. Maslov, K. Katin, V. Efimov and I. Efimova, *Materials Today Nano*, 2022, **20**, 100247.
- 8 A. Bafekry, M. Naseri, M. Faraji, M. M. Fadlallah, D. M. Hoat, H. R. Jappor, M. Ghergherehchi, D. Gogova and H. Afarideh, *Sci Rep*, 2022, **12**, 22269.
- 9 A. Bafekry, M. Faraji, N. N. Hieu, A. Bagheri Khatibani, M. M. Fadlallah, D. Gogova and M. Ghergherehchi, *Applied Surface Science*, 2022, **583**, 152270.
- 10 A. Bafekry, M. Faraji, M. M. Fadlallah, I. Abdolhosseini Sarsari, H. R. Jappor, S. Fazeli and M. Ghergherehchi, *Applied Physics Letters*, 2021, **119**, 142102.
- 11 S. Fozia, A. Hassan, S. A. Reshi, P. Singh, G. A. Bhat, M. Dixit and M. A. Dar, *J. Phys. Chem. C*, 2023, **127**, 11911–11920.
- 12 X. Cai, J. Chen, H. Wang, Y. Ni, Y. Chen and R. Bruce King, *Nanoscale Horizons*, 2023, **8**, 662–673.
- 13 B. Liu, B. Xu, S. Li, J. Du, Z. Liu and W. Zhong, *Journal of Materials Chemistry A*, 2019, **7**, 20799–20805.
- 14 M. Naseri, A. H. Reshak, A. Boochani, D. P. Rai, L. F. Martin and S. Solaymani, *Silicon*, 2018, **10**, 1893–1902.
- 15 R. Gholizadeh and Y.-X. Yu, *J. Phys. Chem. C*, 2014, **118**, 28274–28282.
- 16 Y.-X. Yu, *ACS Appl. Mater. Interfaces*, 2014, **6**, 16267–16275.

- 17 Y.-J. Yu, Y. Zhao, S. Ryu, L. E. Brus, K. S. Kim and P. Kim, *Nano Lett.*, 2009, **9**, 3430–3434.
- 18 P. V. Kumar, M. Bernardi and J. C. Grossman, *ACS Nano*, 2013, **7**, 1638–1645.
- 19 Z. Felegari and S. Hamedani, *Results in Physics*, 2017, **7**, 2626–2631.
- 20 X. Tang, Y. Fang and L. Wu, *Solid State Sciences*, 2020, **109**, 106391.
- 21 X. Liu, S. M. Cho, S. Lin, Z. Chen, W. Choi, Y.-M. Kim, E. Yun, E. H. Baek, D. H. Ryu and H. Lee, *Matter*, 2022, S2590238522002119.
- 22 D. K. Gorai and T. K. Kundu, *Applied Surface Science*, 2022, **590**, 153104.
- 23 B. Yu, H. Ren and X. Piao, *ChemPhysChem*, 2022, **23**, e202100828.
- 24 Y. Zeng, P. Gordiichuk, T. Ichihara, G. Zhang, E. Sandoz-Rosado, E. D. Wetzel, J. Tresback, J. Yang, D. Kozawa, Z. Yang, M. Kuehne, M. Quien, Z. Yuan, X. Gong, G. He, D. J. Lundberg, P. Liu, A. T. Liu, J. F. Yang, H. J. Kulik and M. S. Strano, *Nature*, 2022, **602**, 91–95.
- 25 S. Pashaei and S. Hosseinzadeh, .
- 26 H. Judawisastra, Claudia, F. Sasmita and T. Agung P, *IOP Conf. Ser.: Mater. Sci. Eng.*, 2019, **547**, 012047.
- 27 Y.-X. Yu, *Phys. Chem. Chem. Phys.*, 2023, **26**, 323–335.
- 28 V. Kumar, A. Dey, S. Thomas, M. A. Zaeem and D. R. Roy, *Phys. Chem. Chem. Phys.*, 2021, **23**, 10409–10417.
- 29 Y.-X. Yu, *Applied Surface Science*, 2021, **546**, 149062.
- 30 L.-H. Qu, Z.-Y. Deng, J. Yu, X.-K. Lu, C.-G. Zhong, P. Zhou, T. Lu, J.-M. Zhang and X.-L. Fu, *Vacuum*, 2020, **176**, 109358.
- 31 Y. Luo, C. Ren, Y. Xu, J. Yu, S. Wang and M. Sun, *Sci Rep*, 2021, **11**, 19008.
- 32 M. Singh and B. Chakraborty, *Physical Chemistry Chemical Physics*, 2023, **25**, 16018–16029.
- 33 F. Memarian, A. Fereidoon and M. Darvish Ganji, *Superlattices and Microstructures*, 2015, **85**, 348–356.
- 34 R. C. Andrew, R. E. Mapasha, A. M. Ukpong and N. Chetty, *Phys. Rev. B*, 2012, **85**, 125428.
